# Supplementary material for: Organoid modelling identifies that DACH1 functions as a tumour promoter in colorectal cancer by modulating BMP signalling
Source: PubMed Central journal article supplement — eBioMedicine. 2020 Jun 6;56:102800. doi: 10.1016/j.ebiom.2020.102800 (PMC7281795; doi:10.1016/j.ebiom.2020.102800), 2020-06-06
Supplement: mmc1.pdf [file mmc1.pdf]

## Supplementary data

for " Organoid modelling identifies that DACH1 functions as a tumour promoter in colorectal cancer by modulating BMP signalling "

### Supplementary Figures:

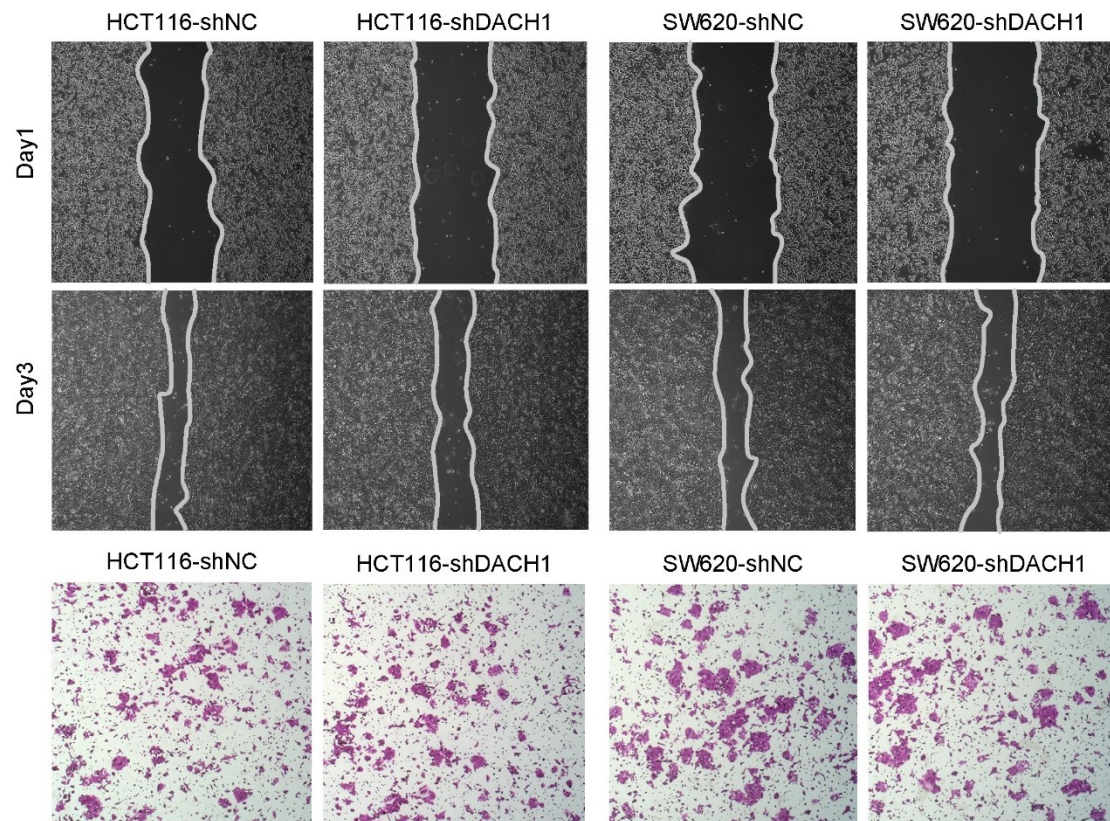

**Figure S1.** DACH1 showed no significant effects on cell migration in vitro. Knocking down DACH1 in HCT116 cells and SW620 cells did not affect the migration of cells in vitro, as detected by scratch assays and transwell assays.

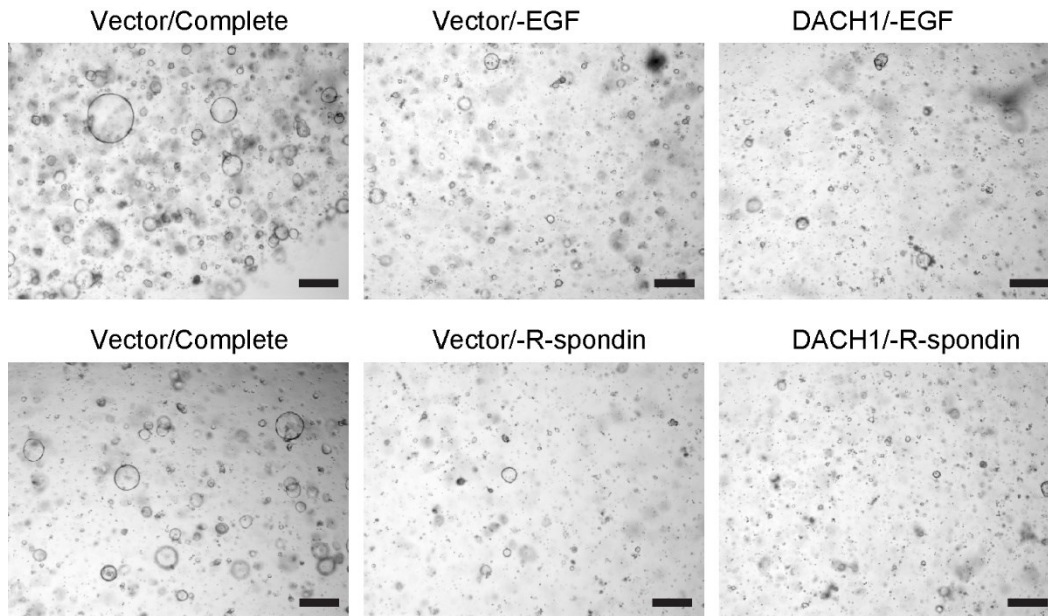

**Figure S2.** DACH1 overexpression did not compensate for the depletion of EGF or R-spondin

Organoids transfected with empty vector showed normal organoid formation and growth in complete organoid medium. Depletion of EGF or R-spondin resulted in gross inhibition of organoid formation and growth in both control organoids and DACH1-overexpressing organoids. Scale bars=200  $\mu$ m.

### Supplementary methods:

#### Wound healing assays and transwell assays

To assess colon cancer cell migratory capacity, wound healing assays and transwell assays were conducted. For wound healing assays,  $4 \times 10^5$  cells were seeded in a well of a 6-well plate. After cells grew to form a monolayer, the well was scratched using a 200  $\mu$ L pipette tip. Wound healing assay images were taken on days 1 and 3. For transwell assays,  $1 \times 10^4$  cells were plated in the upper chamber of 8  $\mu$ m porous transwell inserts (Corning). The cells were

incubated for 3 days in 24-well plates. Cells were fixed with 4% paraformaldehyde/PBS (Yeasen) for 30 min and stained with 2% crystal violet for 30 min at room temperature. After removing the non-migrated cells in the upper chamber with a cotton swab, the stained cells were quantified under a light microscope, and representative images were captured.

**Main primers used in the study:**

| Primers used for qRT-PCR | Sequence                |
|--------------------------|-------------------------|
| NBL1-qRT-F-primer        | AGTCCACAGAGTCCCTGGTT    |
| NBL1-qRT-R-primer        | GCAGCTACAGTGCAGGATCT    |
| BMP7-qRT-F-primer        | TAGCCATTTCTCACCGACG     |
| BMP7-qRT-R-primer        | ACGTCTCATTGTCTGAAGCGT   |
| SMAD4-qRT-F-primer       | CTCATGTGATCTATGCCCGTC   |
| SMAD4-qRT-R-primer       | AGGTGATACAACTCGTTCGTAGT |
| LGR5-qRT-F-primer        | CTCCCAGGTCTGGTGTGTTG    |
| LGR5-qRT-R-primer        | GAGGTCTAGGTAGGAGGTGAAG  |
| Notch1-qRT-F-primer      | CGCTGACGGAGTACAAGTG     |
| Notch1-qRT-R-primer      | GTAGGAGCCGACCTCGTTG     |
| DACH1-qRT-F-primer       | GGGGCTTGCATACGGTCTAC    |
| DACH1-qRT-R-primer       | CGAACTTGTTCCACATTGCACA  |
| HES1-qRT-F-primer        | TCAACACGACACCGGATAAAC   |
| HES1-qRT-R-primer        | GCCGCGAGCTATCTTTCTTCA   |
| ATOH8-qRT-F-primer       | CAAGAAGCGCAAGGAGTGAC    |
| ATOH8-qRT-R-primer       | GCATCTTGGAGAAGACCACGA   |
| TGFB3-qRT-F-primer       | GGAAAACACCGAGTCGGAATAC  |
| TGFB3-qRT-R-primer       | GCGGAAAACCTTGGAGGTAAT   |
| MSX1-qRT-F-primer        | CGAAGTCTGATCCCTGCCAA    |
| MSX1-qRT-R-primer        | ACACCGATTTCTCTGCGCTT    |
| FKBP4-qRT-F-primer       | GAAGGCGTGCTGAAGGTCAT    |
| FKBP4-qRT-R-primer       | TGCCATCTAATAGCCAGCCAG   |
| FKBP8-qRT-F-primer       | AACCTTCCAACAAGACGATCC   |
| FKBP8-qRT-R-primer       | CCCAGCATTTTCCGGTACAAG   |
| ID1-qRT-F-primer         | CTGCTCTACGACATGAACGG    |
| ID1-qRT-R-primer         | GAAGGTCCCTGATGTAGTCGAT  |
| MAPK3-qRT-F-primer       | CTACACGCAGTTGCAGTACAT   |
| MAPK3-qRT-R-primer       | CAGCAGGATCTGGATCTCCC    |
| GAPDH-qRT-F-primer       | GGAGCGAGATCCCTCCAAAAT   |
| GAPDH-qRT-R-primer       | GGCTGTTGTCATACTTCTCATGG |
